# Supplementary material for: Propane and propane–water interactions: a study at cryogenic temperatures
Source: Royal Society of Chemistry journal article supplement (doi:10.1039/c7cp06467e), 2017-12-14
Supplement: c7cp06467e1.pdf [file c7cp06467e1.pdf]

# Propane and Propane-Water interactions: A Study at Cryogenic Temperatures†

Jyotirmoy Ghosh<sup>1</sup>, Annapoorani Kobuvayur Hariharan<sup>1</sup>, Radha Gobinda Bhui<sup>†</sup>, Rabin Rajan Joseph Methikkalam<sup>1</sup>, and Thalappil Pradeep<sup>1\*</sup>

<sup>1</sup>DST Unit of Nanoscience (DST UNS) and Thematic Unit of Excellence (TUE), Department of Chemistry, Indian Institute of Technology Madras, Chennai 600 036, India

\*Corresponding author: Fax: + 91-44 2257-0545/0509

\*E-mail: [pradeep@iitm.ac.in](mailto:pradeep@iitm.ac.in)

## Supporting Information:

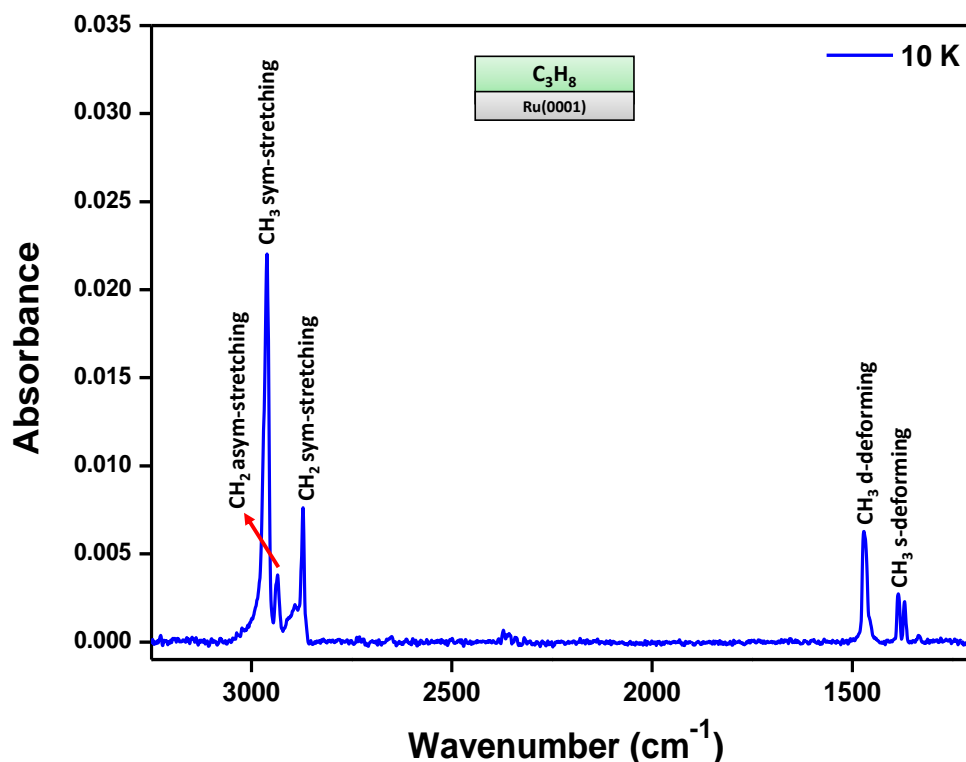

**Fig. S1** RAIR spectrum of 150 ML of propane which was deposited on Ru(0001) substrate at 10 K. Different modes of molecular vibrations of propane are assigned in the RAIR spectrum.

**Table S1. IR peaks and vibrational band positions for solid and gaseous propane**

| Sr. no. | Symmetry species | Vibrational mode              | Solid phase (Experimental) (cm <sup>-1</sup> ) |      | Gas phase <sup>1</sup> (cm <sup>-1</sup> ) | Solid phase <sup>2</sup> (cm <sup>-1</sup> ) |
|---------|------------------|-------------------------------|------------------------------------------------|------|--------------------------------------------|----------------------------------------------|
|         |                  |                               | 10 K                                           | 70 K |                                            |                                              |
| 1       | A <sub>1</sub>   | CH <sub>3</sub> d-stretch     |                                                |      | 2977                                       |                                              |
| 2       | A <sub>1</sub>   | CH <sub>3</sub> s-stretch     | 2961.66                                        | 2965 | 2962                                       |                                              |
| 3       | A <sub>1</sub>   | CH <sub>2</sub> s-stretch     | 2871.89                                        | 2873 | 2887                                       |                                              |
| 4       | A <sub>1</sub>   | CH <sub>3</sub> d-deformation |                                                |      | 1476                                       |                                              |
| 5       | A <sub>1</sub>   | CH <sub>2</sub> scissoring    |                                                |      | 1462                                       |                                              |
| 6       | A <sub>1</sub>   | CH <sub>3</sub> d-deformation | 1386.44                                        | 1388 | 1392                                       | 1382                                         |
| 7       | A <sub>1</sub>   | CH <sub>3</sub> rocking       | 1155.70                                        | 1156 | 1158                                       | 1155                                         |
| 8       | A <sub>1</sub>   | C-C stretch                   | 868.77                                         | 867  | 869                                        | 869                                          |
| 9       | A <sub>1</sub>   | C-C-C deformation             |                                                |      | 369                                        |                                              |
| 10      | B <sub>1</sub>   | CH <sub>3</sub> d-stretch     |                                                |      | 2968                                       |                                              |
| 11      | B <sub>1</sub>   | CH <sub>3</sub> s-stretch     |                                                | 2866 | 2887                                       |                                              |
| 12      | B <sub>1</sub>   | CH <sub>3</sub> d-deformation |                                                |      | 1464                                       |                                              |
| 13      | B <sub>1</sub>   | CH <sub>3</sub> s-deformation | 1369.69                                        | 1369 | 1378                                       | 1368                                         |
| 14      | B <sub>1</sub>   | CH <sub>2</sub> wagging       |                                                |      | 1338                                       |                                              |
| 15      | B <sub>1</sub>   | C-C stretch                   | 1051.09                                        | 1049 | 1054                                       | 1050                                         |
| 16      | B <sub>1</sub>   | CH <sub>3</sub> rocking       | 920.31                                         | 917  | 922                                        | 918                                          |
| 17      | B <sub>1</sub>   | CH <sub>3</sub> d-stretch     |                                                |      | 922                                        |                                              |
| 18      | B <sub>2</sub>   | CH <sub>3</sub> d-stretch     |                                                |      | 2973                                       |                                              |
| 19      | B <sub>2</sub>   | CH <sub>2</sub> a-stretch     |                                                | 2957 | 2968                                       |                                              |
| 20      | B <sub>2</sub>   | CH <sub>3</sub> d-deformation | 1471.36                                        |      | 1472                                       |                                              |
| 21      | B <sub>2</sub>   | CH <sub>3</sub> rocking       |                                                |      | 1192                                       |                                              |
| 22      | B <sub>2</sub>   | CH <sub>2</sub> rocking       | 742                                            | 747  | 748                                        | 745                                          |

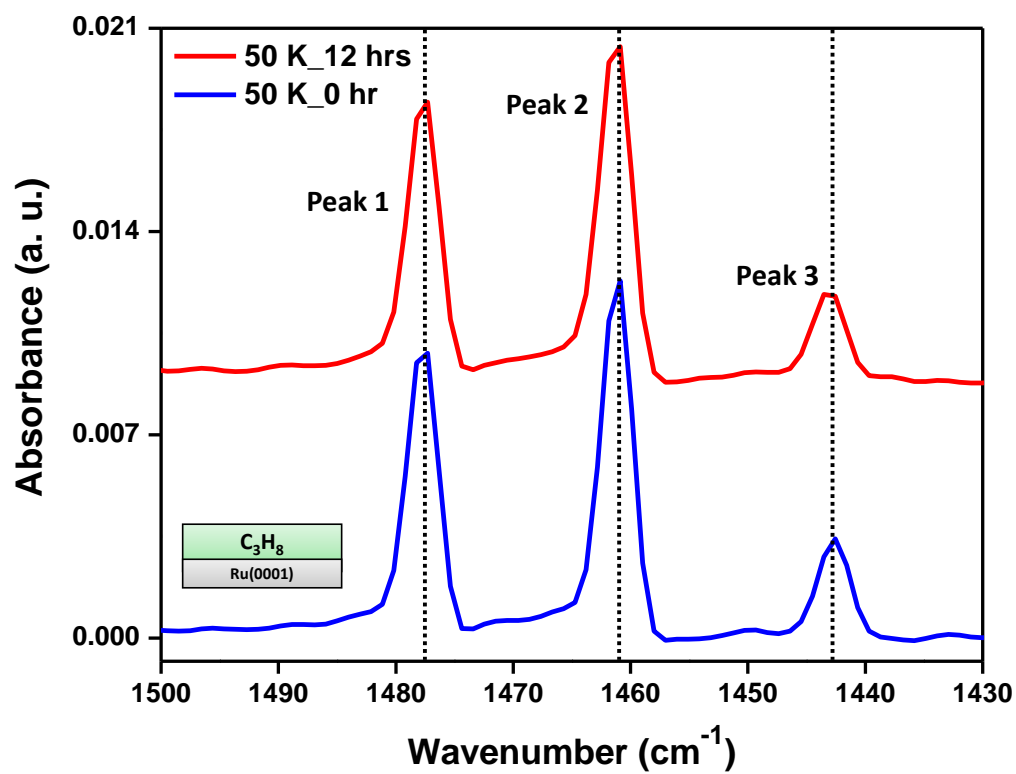

**Fig. S2** Study of stability of phase I of propane by RAIR. 150 ML of propane was deposited at 10 K, and it was heated to 50 K for first phase transition. Then, the system was kept at 50 K for 12 hours to check the stability of the phase I.

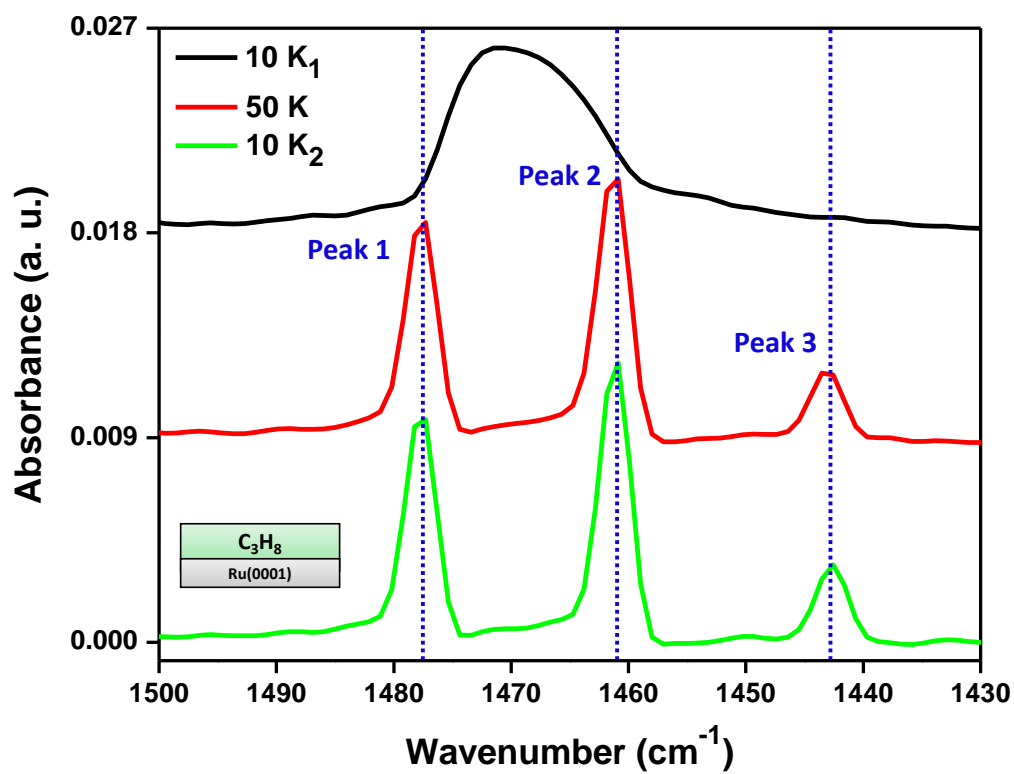

**Fig. S3** Study of reversibility of first phase transition of propane by RAIR. 150 ML of propane was deposited at 10 K, and it was heated to 50 K to observe the first phase transition. Again, the system was cooled down at 10 K to check the reversibility of the phase transition.

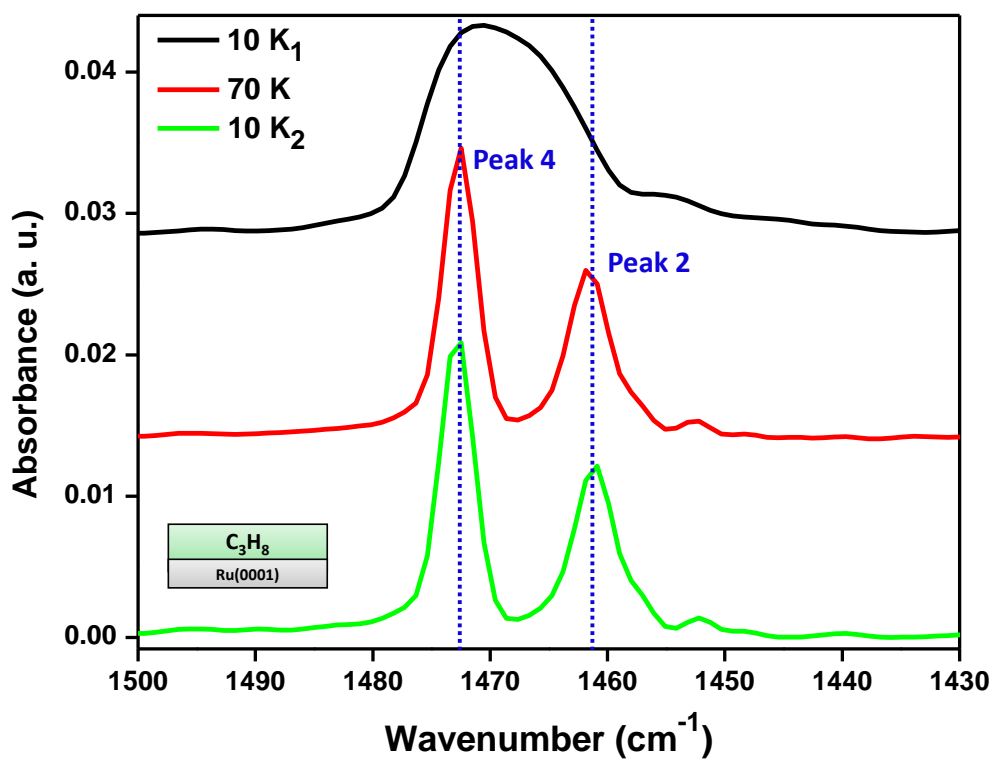

**Fig. S4** Study of reversibility of second phase transition of propane by RAIR. 150 ML of propane was deposited at 10 K, and it was heated to 70 K to observe the second phase transition. Again, the system was cooled down at 10 K to check the reversibility the phase transition.

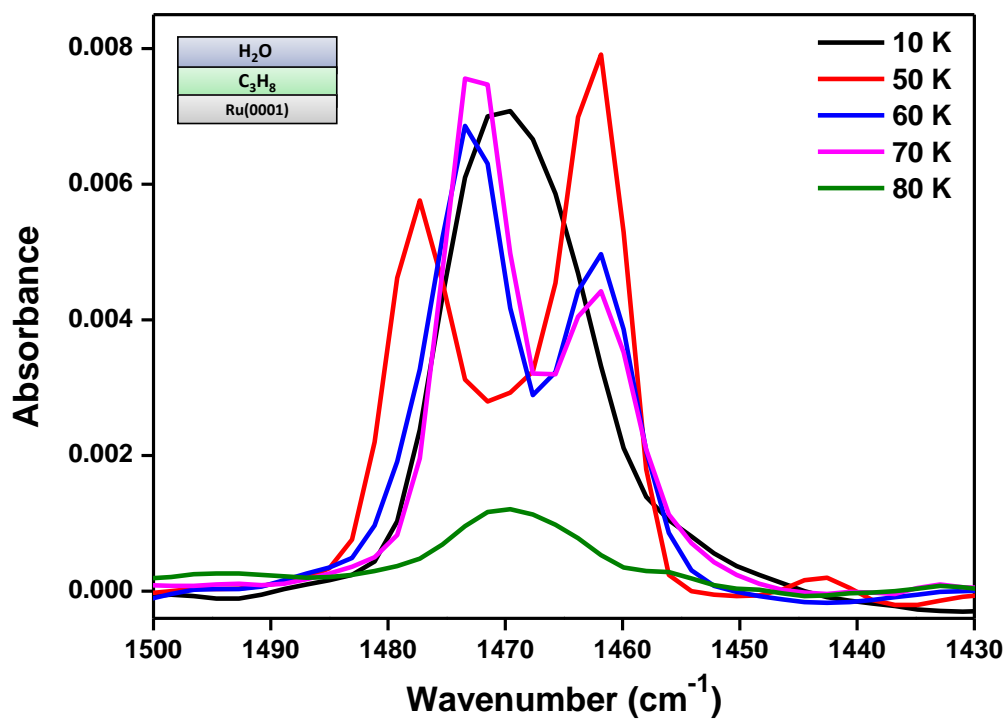

**Fig. S5** Temperature dependent RAIR spectra of 150 ML of water deposited on 150 ML of propane at 10 K. After the deposition, the  $C_3H_8@H_2O$  system was heated at 2 K/min heating rate and the RAIR spectra were measured at different temperatures.

## References

1. T. Shimanouchi, *National Bureau of Standards*, 1972, **Consolidated Volume I**, 1-160.
2. M. A. Goodman, R. L. Sweany and R. L. Flurry, Jr., *J. Phys. Chem.*, 1983, **87**, 1753-1757.
